# Supplementary material for: C60 as an active smart spacer material on silver thin film substrates for enhanced surface plasmon coupled emission
Source: Royal Society of Chemistry journal article supplement (doi:10.1039/c4cp06090c), 2015-01-01
Supplement: c4cp06090c1.pdf [file c4cp06090c1.pdf]

Supporting Information

## **C<sub>60</sub> as an Active Smart Spacer Material on Silver Thin Film Substrates for Enhanced Surface Plasmon Coupled Emission**

Pradyumna Mulpur<sup>†</sup>, Ramakrishna Podila<sup>§‡</sup>, Sai Sathish Ramamurthy<sup>¶</sup>, Venkataramaniah Kamiseti<sup>†</sup> and Apparao M. Rao<sup>\*§‡</sup>

<sup>†</sup>Department of Physics, Sri Sathya Sai Institute of Higher Learning, Prasanthinilayam 515134, India

<sup>¶</sup>Department of Chemistry, Sri Sathya Sai Institute of Higher Learning, Prasanthinilayam 515134, India

<sup>§</sup>Department of Physics and Astronomy and <sup>‡</sup>Clemson Nanomaterials Center, Clemson University, Clemson, South Carolina 29634, United States

\*Corresponding Author:

Prof. Apparao M. Rao

Email: arao@clemson.edu

Telephone: (864) 656 – 6758

Fax: (864) 656 - 0805

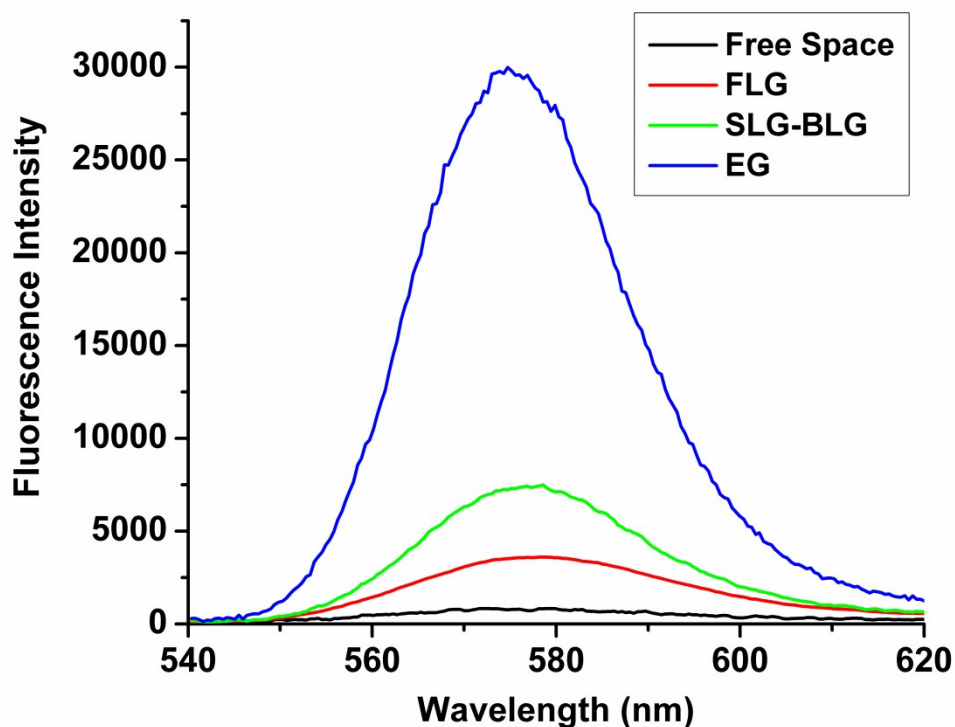

**SI Figure 1:** A plot depicting the SPCE enhancement of the fluorescence signal intensity of RhB for different graphene-Ag substrates: SLG-BLG (single-bilayer graphene), FLG (few layer graphene) and EG (exfoliated graphene). The maximum enhancement was observed in EG (40-fold).

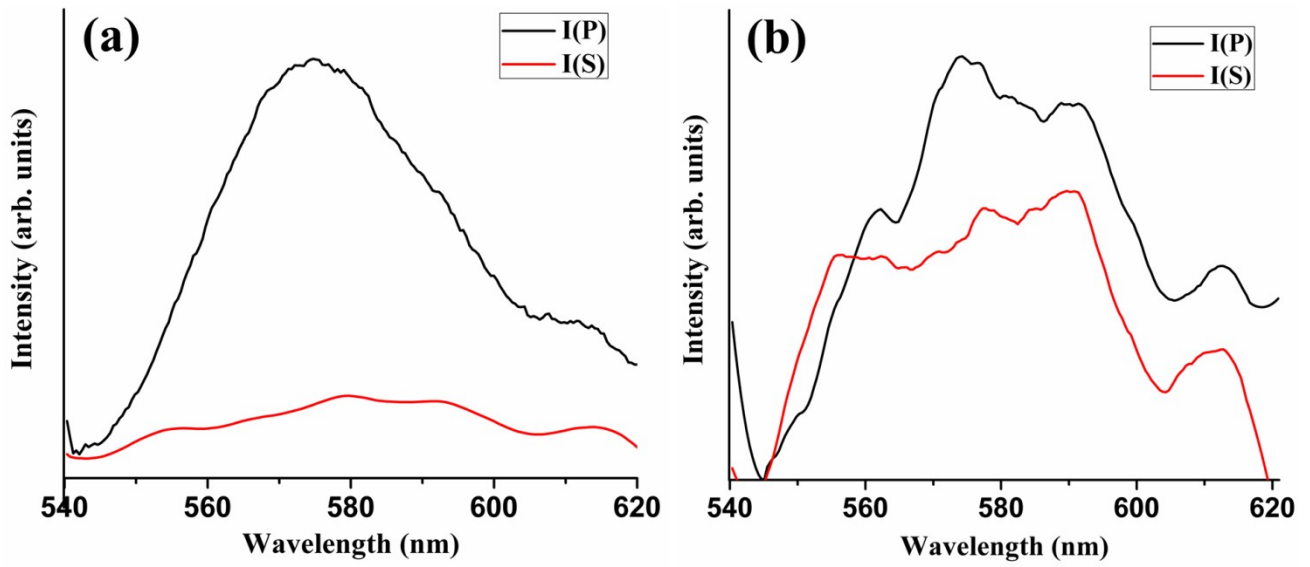

**SI Figure 2:** Polarized emission intensity plots of RhB fluorophore showing (a) Predominantly *p*-polarized output from glass coated with C<sub>60</sub> and (b) plain glass substrate 'without C<sub>60</sub>' exhibiting equivalent *p/s* polarized modes.
